# Supplementary material
Source: PubMed Central journal article supplement (PMC7160396)
Supplement: ONCO-25-310-s001.pdf [file ONCO-25-310-s001.pdf]

Supplemental Table for:

Acupuncture for Chemotherapy-Induced Peripheral Neuropathy in Breast Cancer Survivors, A Randomized Controlled Pilot Trial

Weidong Lu et al.

**Supplemental Table 1:** Acupuncture Points and Locations for the Study of Chemotherapy-induced Peripheral Neuropathy

| Name      | Chinese Pinyin Name | Location                                                                                                                                                                                                                                                                                                     | Innervations                                                                                                                                  |
|-----------|---------------------|--------------------------------------------------------------------------------------------------------------------------------------------------------------------------------------------------------------------------------------------------------------------------------------------------------------|-----------------------------------------------------------------------------------------------------------------------------------------------|
| Ex-LE12   | Qiduan              | At the tips of the toes; from the big toe to the small toe on the each side<br>as 1 <sup>st</sup> Qiduan, 2 <sup>nd</sup> Qiduan, 3 <sup>rd</sup> Qiduan, 4 <sup>th</sup> Qiduan and 5 <sup>th</sup> Qiduan                                                                                                  | The dorsal digital nerves from the superficial peroneal and deep peroneal nerves, and the proper digital plantar nerve from the tibial nerve. |
| Ex-LE10   | Bafeng              | On the dorsum of foot, in the depressions on the webs between toes, proximal to the margins of the webs, at the junction of the red and white skin; from the big toe to the small toe on the each side as 1 <sup>st</sup> Bafeng, 2 <sup>nd</sup> Bafeng, 3 <sup>rd</sup> Bafeng, and 4 <sup>th</sup> Bafeng | No innervation data at this time                                                                                                              |
| Extra 27  | Baxie               | On the dorsum of the hand, at the junction of the white and red skin of the hand web between the fingers, from the thumb to the small finger as 1 <sup>st</sup> Baxie, 2 <sup>nd</sup> Baxie, 3 <sup>rd</sup> Baxie and 4 <sup>th</sup> Baxie                                                                | No innervation data at this time                                                                                                              |
| TE5 (TW5) | Waiguan             | 2 cun proximal to the dorsal crease of wrist, on the line connecting Yangchi (TE4) and the tip of olecranon, between the radius and ulna.                                                                                                                                                                    | The posterior antebrachial cutaneous nerve; deeper, the posterior interosseous nerve and the anterior interosseous nerve.                     |
| LR3       | Taichong            | On the dorsum of the foot, in the depression distal to the junction of the first and second metatarsal bones.                                                                                                                                                                                                | The branch of the deep peroneal nerve.                                                                                                        |
| LII1      | Quchi               | When the elbow is flexed, the point is in the depression at the lateral end of the transverse cubital crease, midway between Chize and the lateral epicondyle of the humerus.                                                                                                                                | The posterior antebrachial cutaneous nerve; deeper, on the medial side, the radial nerve.                                                     |
| ST36      | Zusanli             | 3 cun below Dubi, one finger-breadth from the anterior crest of the tibia, in m. tibialis anterior.                                                                                                                                                                                                          | Superficially, the lateral auricular cutaneous nerve and the cutaneous branch of the saphenous nerve; deeper, the deep peroneal nerve.        |
| SP9       | Yinlingquan         | On the lower border of the medial condyle of the tibia, in the depression on the medial border of the tibia.                                                                                                                                                                                                 | Superficially, in the medial crural cutaneous nerve; deeper, the tibial nerve.                                                                |
| SP6       | Sanyinjiao          | 3 cun directly above the tip of the medial malleolus, on the posterior border of the medial aspect of the tibia.                                                                                                                                                                                             | Superficially, the medial crural cutaneous nerve; deeper, in the posterior aspect, the tibial nerve.                                          |
| K3        | Taixi               | In the depression between the medial malleolus and tendo calcaneus, at the level with the tip of the medial malleolus.                                                                                                                                                                                       | The medial crural cutaneous nerve, on the course of the tibial nerve.                                                                         |
| Extra2    | Yintang             | Midway between the medial ends of the two eyebrows.                                                                                                                                                                                                                                                          | N/A                                                                                                                                           |
